# Supplementary material for: Addition of grapes to both a standard and a high-fat Western pattern diet modifies hepatic and urinary metabolite profiles in the mouse
Source: Royal Society of Chemistry journal article supplement (doi:10.1039/d2fo00961g), 2022-01-01
Supplement: d2fo00961g1.pdf [file d2fo00961g1.pdf]

## Addition of grapes to both a standard and a high-fat Western pattern diet modifies hepatic and urinary metabolite profiles in the mouse

Diren Beyoğlu, Eun-Jung Park, Adolfo Quiñones-Lombrana, Asim Dave, Falguni Parande,  
John M. Pezzuto, Jeffrey R. Idle

### SUPPLEMENTARY FILES

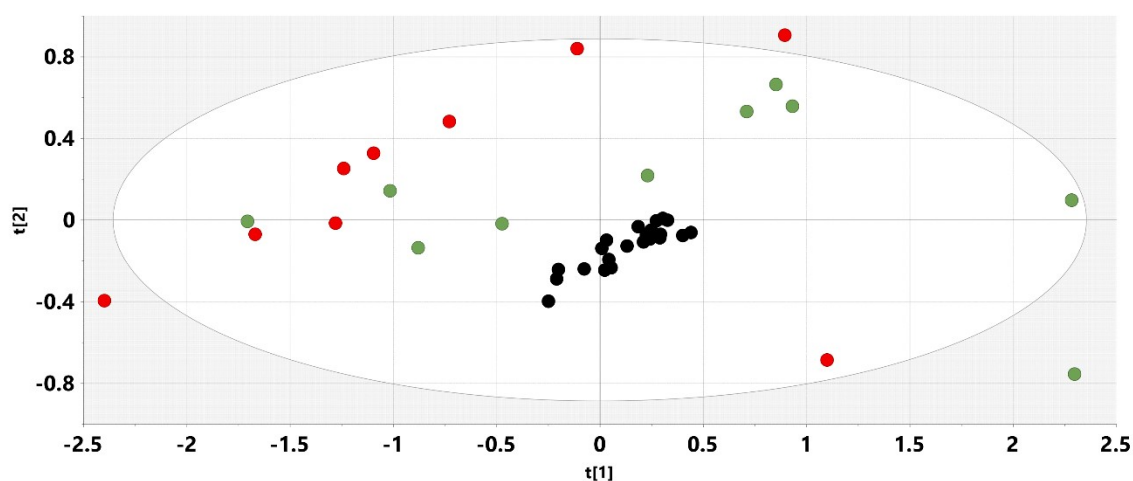

**Figure S1.** Principal components analysis (PCA) for STD vs. STDGP (see Fig. 1) showing GC samples (black), standard diet (STD; green) and standard diet plus grape powder (STDGP; red).

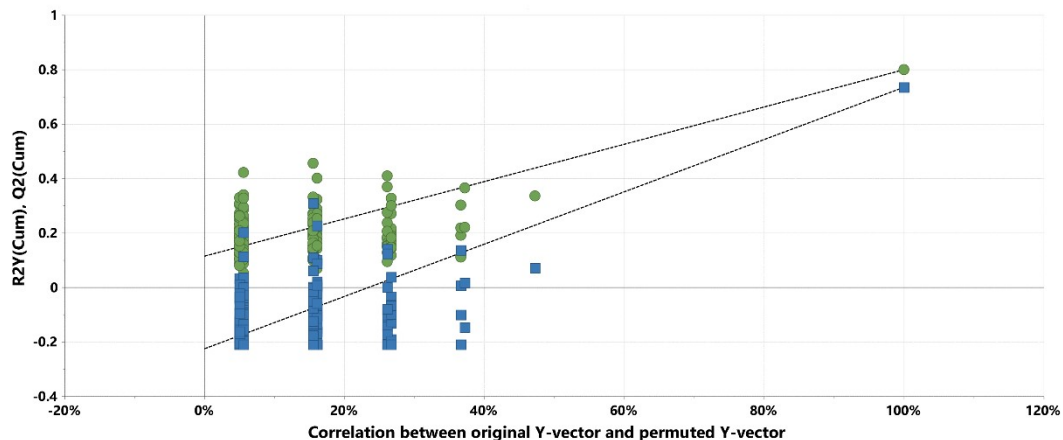

**Figure S2.** Validation of the PLS-DA model for Fig. 1 (STD vs. STDGP urine) using leave-one-out cross-validation with 200 permutations.

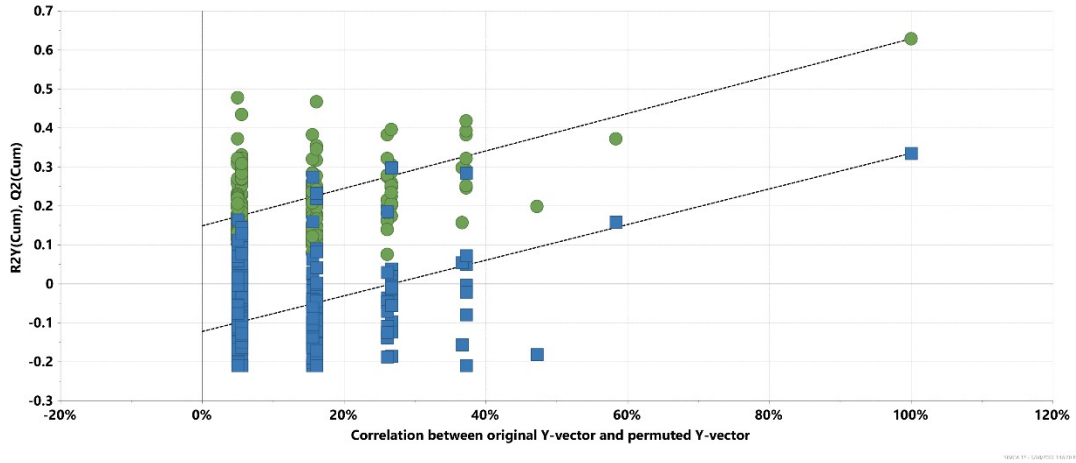

**Figure S3.** Validation of the PLS-DA model for Fig. 4 (STD vs. STDGP liver) using leave-one-out cross-validation with 200 permutations.

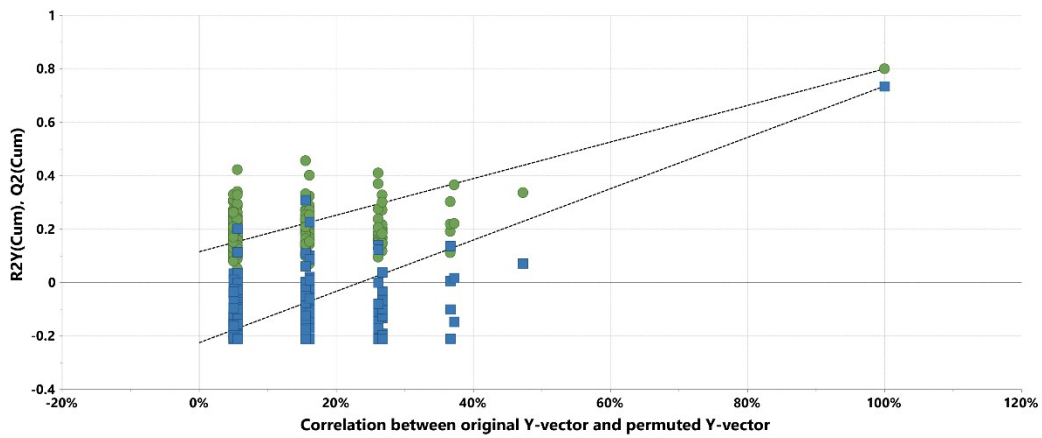

**Figure S4.** Validation of the PLS-DA model for Fig. 7 (HFD vs. HFDGP urine) using leave-one-out cross-validation with 200 permutations.

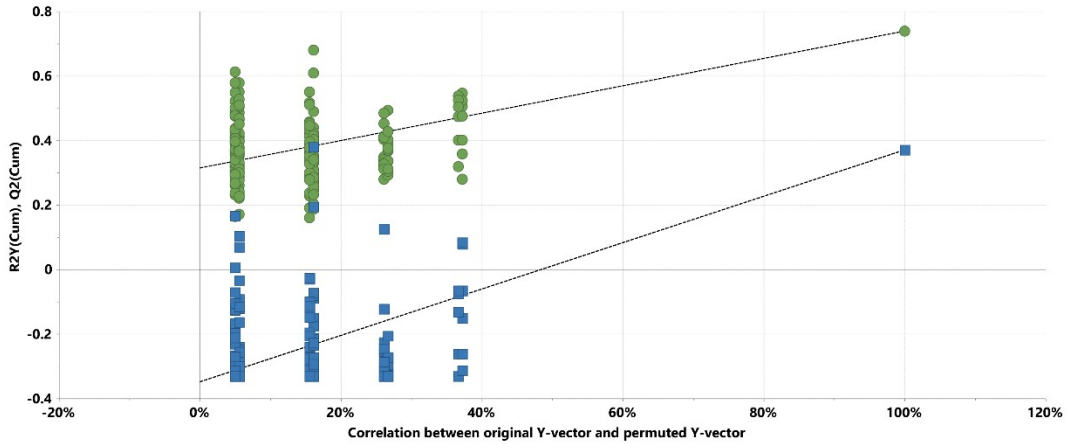

**Figure S5.** Validation of the PLS-DA model for Fig. 1 (HFD vs. HFDGP liver) using leave-one-out cross-validation with 200 permutations.

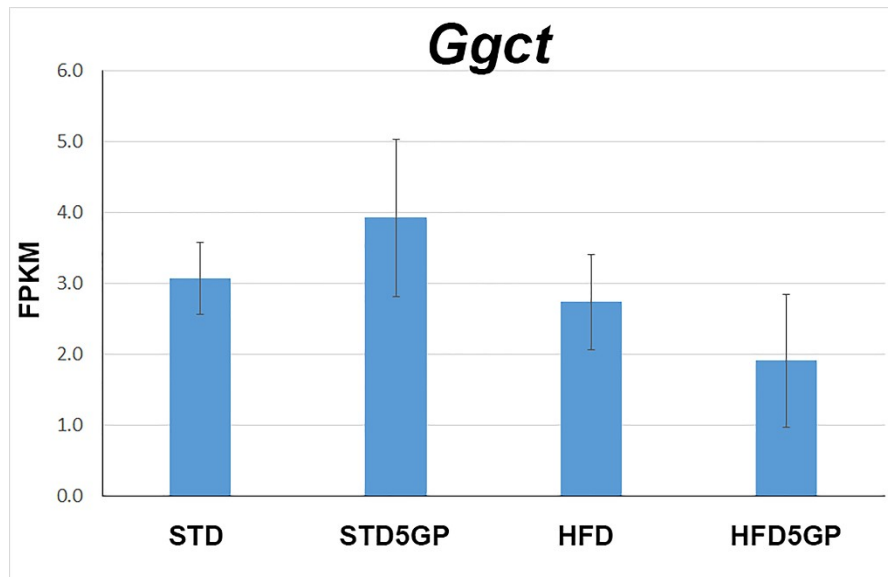

**Figure S6.** mRNA expression findings for *Ggct* in mouse liver from each group. Data taken from the RNAseq analysis of Dave *et al.* (2022), which studied the same mice [44]. FPKM means fragments per kilo base of transcript per million mapped fragments.
